# Supplementary material for: Genotypic Variability on Grain Yield and Grain Nutritional Quality Characteristics of Wheat Grown under Elevated CO2 and High Temperature
Source: MDPI journal article supplement (doi:10.3390/plants10061043), 2021-05-21
Supplement: s1 [file s1]

**Table S1.** Eigenvalues and explained variance for the canonical biplot.

| Dimension | Eigenvalue | Explained variance | Cumulative |
|-----------|------------|--------------------|------------|
| 1         | 3.98       | 32.45              | 32.45      |
| 2         | 3.18       | 20.73              | 53.18      |
| 3         | 2.80       | 16.07              | 69.26      |
| 4         | 2.36       | 11.39              | 80.65      |
| 5         | 1.74       | 6.22               | 86.87      |
| 6         | 1.67       | 5.75               | 92.62      |
| 7         | 1.38       | 3.89               | 96.51      |
| 8         | 1.09       | 2.45               | 98.96      |
| 9         | 0.71       | 1.04               | 100.00     |

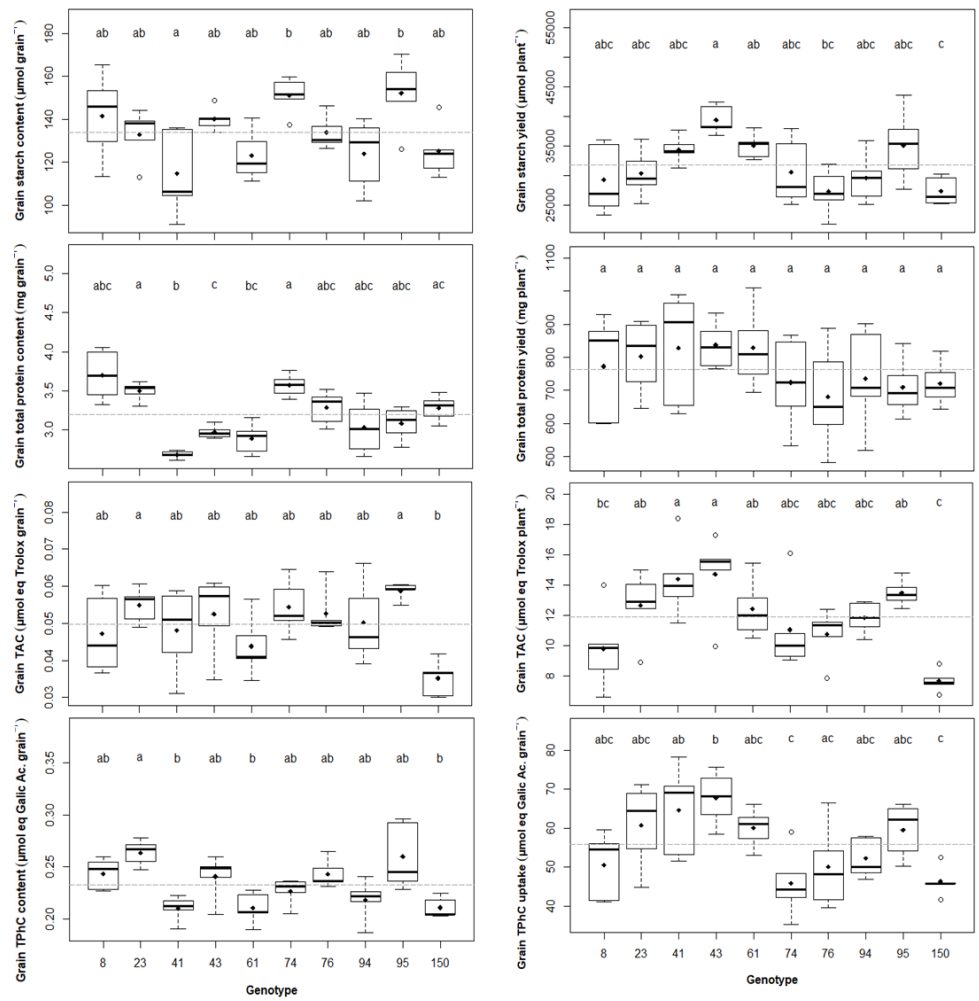

**Figure S1.** Boxplots of non-mineral nutrients per grain and plant.

TAC: total antioxidant capacity; TP: total protein; TPnC: Total phenolic compounds.

Black dots represent the mean of the five replicates ( $n=5$ ) per genotype. The grey dotted line represents the mean among all the genotypes and replicates ( $N=50$ ). The same letter indicates non-statistically significant differences at  $p < 0.05$  as determined by post-hoc tests.

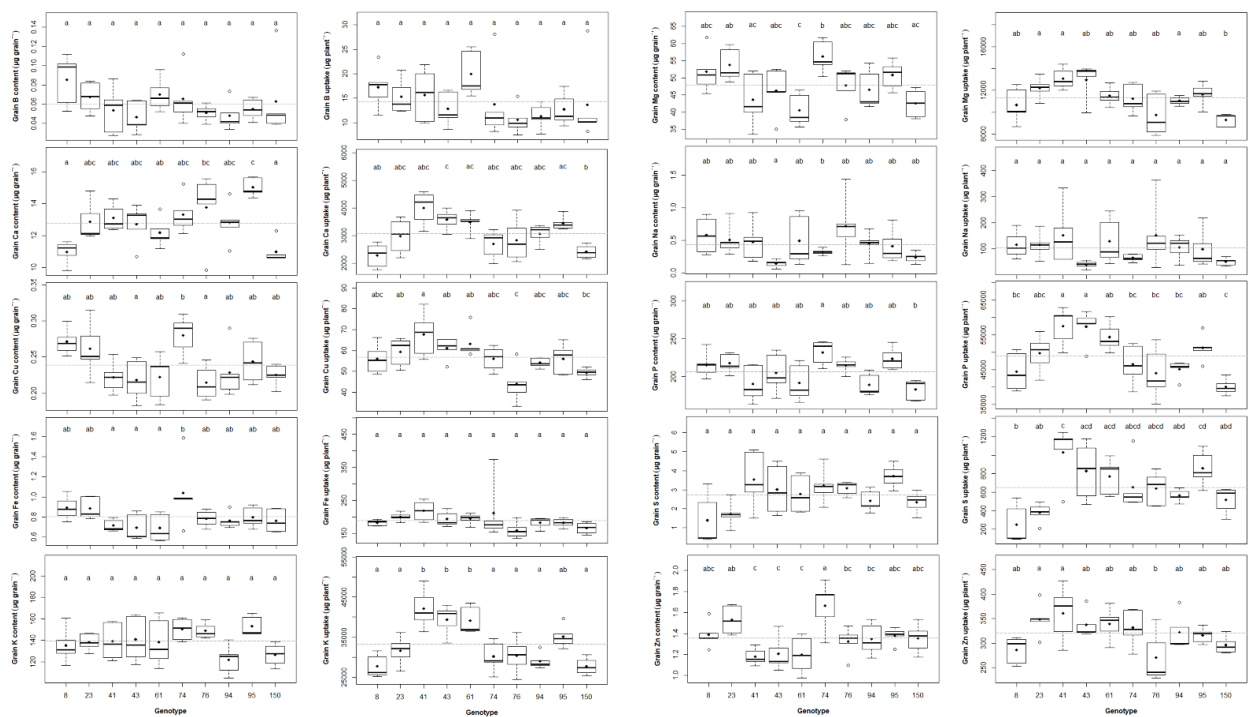

**Figure S2.** Boxplots of the contents in mineral components per grain and plant.

Black dots represent the mean of the five replicates ( $n=5$ ) per genotype. The grey dotted line represents the mean among all the genotypes and replicates ( $N=50$ ). The same letter indicates non-statistically significant differences at  $p < 0.05$  as determined by post-hoc tests.
